# Supplementary material
Source: PubMed Central journal article supplement (PMC3253962)
Supplement: NIHMS336883-supplement-1.pdf [file NIHMS336883-supplement-1.pdf]

## Supplementary Material

Supplemental Figure S1: Single SNP results based on the most significant meta-association evidence for each tSNP (dominant or recessive models).

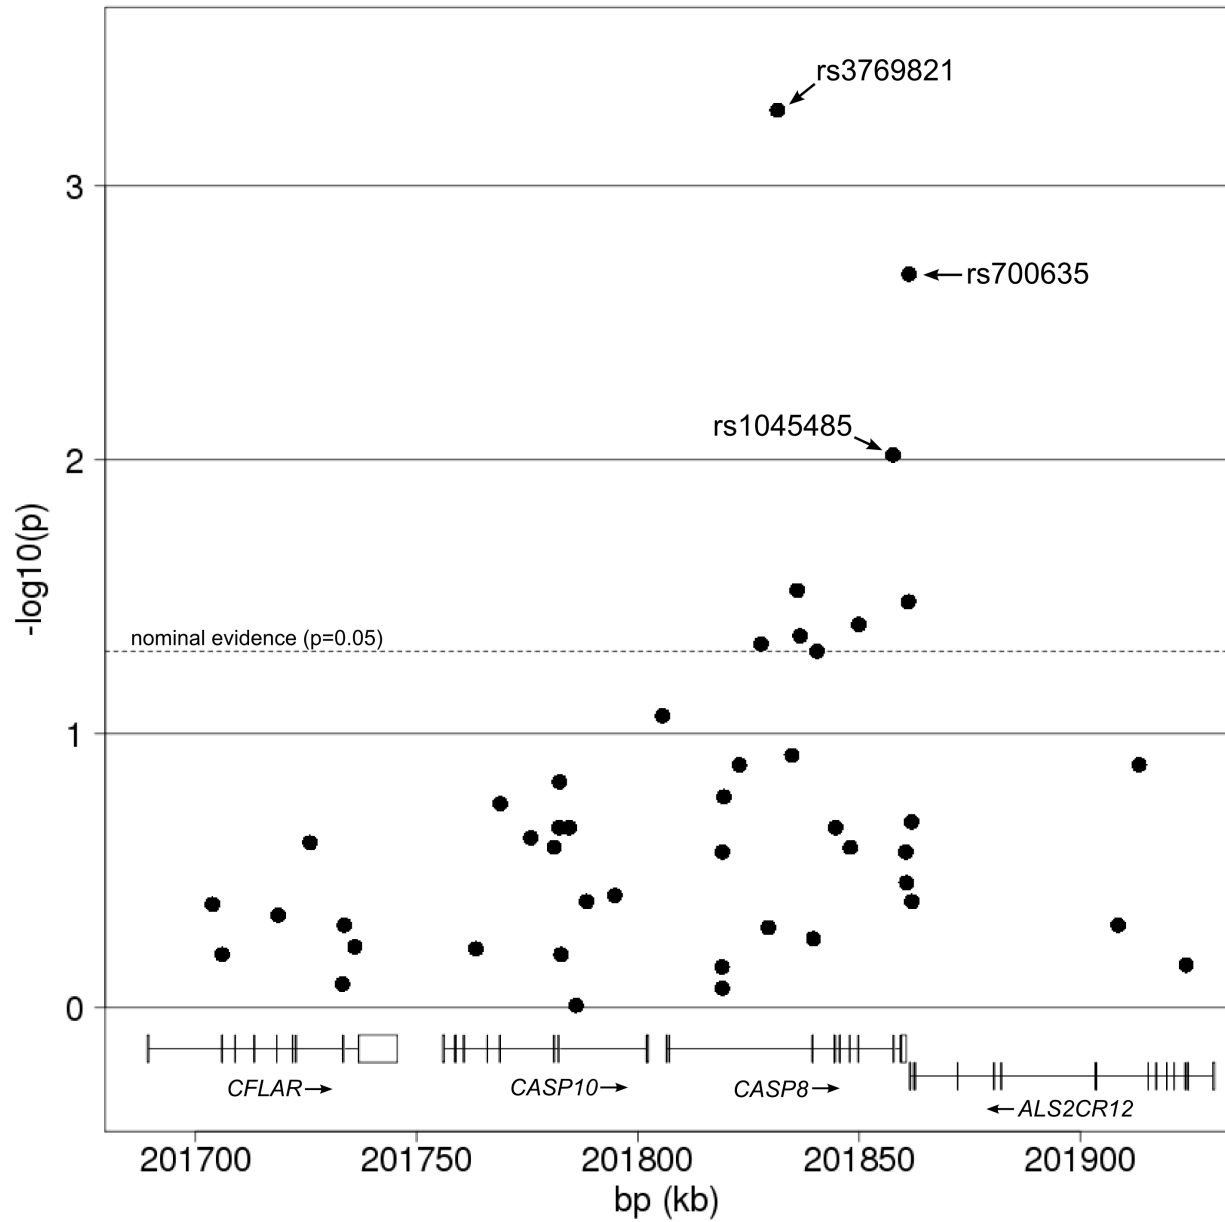

**Supplementary Table 1: Tagging-SNP details**

| Gene           | bp        | SNP           | Call rate | Call rate | Alleles<br>(maj=1/min=2) | MAF    |
|----------------|-----------|---------------|-----------|-----------|--------------------------|--------|
|                |           |               | SBCS      | UBCS      |                          |        |
| CFLAR          | 201704024 | rs12620435    | 100.0     | 99.8      | A / G                    | 0.1135 |
| CFLAR          | 201706206 | rs11681674    | 98.9      | 98.1      | G / A                    | 0.0037 |
| CFLAR          | 201718871 | rs7573529     | 99.8      | 99.7      | C / T                    | 0.2054 |
| CFLAR          | 201726075 | rs719126      | 98.6      | 99.5      | G / A                    | 0.0433 |
| CFLAR          | 201733376 | rs2518142     | 99.4      | 99.4      | A / G                    | 0.0884 |
| CFLAR          | 201733866 | rs1594        | 99.9      | 99.2      | C / T                    | 0.4730 |
| CFLAR          | 201736187 | rs12721503    | 98.9      | 99.6      | T / C                    | 0.0242 |
| CASP10         | 201763557 | rs12613347    | 99.7      | 99.5      | C / T                    | 0.2186 |
| CASP10         | 201769065 | rs3731714     | 99.3      | 98.9      | G / A                    | 0.3150 |
| CASP10         | 201775958 | rs41343445    | 99.5      | 99.2      | A / G                    | 0.0065 |
| CASP10         | 201781218 | rs41419046    | 98.7      | 99.8      | A / T                    | 0.0080 |
| CASP10         | 201782343 | rs13010627    | 99.5      | 81.9      | G / A                    | 0.0597 |
| CASP10         | 201782452 | rs17860405    | 88.1      | 90.7      | A / G                    | 0.0422 |
| CASP10         | 201782773 | rs7576306     | 99.1      | 99.6      | A / G                    | 0.4998 |
| CASP10         | 201784693 | rs6435068     | 99.9      | 98.0      | T / C                    | 0.0354 |
| CASP10         | 201786202 | rs41514050    | 82.4      | 99.2      | C / T                    | 0.0010 |
| CASP10         | 201788555 | rs10931932    | 98.8      | 99.5      | C / A                    | 0.0871 |
| CASP10         | 201794910 | rs41373151    | 99.8      | 99.9      | G / A                    | 0.0628 |
| CASP8          | 201805777 | rs3834129     | 91.0      | 92.9      | ins/del**                | 0.5257 |
| CASP8          | 201819185 | SNP50_9898_ct | 99.0      | 90.5      | C / T                    | 0.0010 |
| CASP8          | 201819204 | rs7608692     | 99.6      | 99.2      | G / A                    | 0.2105 |
| CASP8          | 201819265 | rs3820972     | 98.5      | 99.4      | T / G                    | 0.0771 |
| CASP8          | 201819625 | rs3769825     | 99.7      | 99.0      | C / T                    | 0.4325 |
| CASP8          | 201823079 | rs7570325     | 100.0     | 99.8      | C / T                    | 0.0286 |
| CASP8          | 201828012 | rs13402616    | 88.4      | 99.6      | T / C                    | 0.0625 |
| CASP8          | 201829651 | rs35534358    | 99.6      | 99.5      | T / G                    | 0.0009 |
| CASP8          | 201831675 | rs3769821     | 99.0      | 98.9      | A / G                    | 0.3166 |
| CASP8          | 201834953 | rs7568770     | 99.6      | 99.5      | G / A                    | 0.0005 |
| CASP8          | 201836192 | rs6435074     | 88.1      | 97.2      | C/A                      | 0.2594 |
| CASP8          | 201836863 | rs6723097     | 98.6      | 90.0      | C/A                      | 0.3535 |
| CASP8          | 201839832 | rs2293554     | 97.8      | 99.0      | A / C                    | 0.0714 |
| CASP8          | 201840650 | rs34088540    | 99.9      | 99.8      | T / A                    | 0.0591 |
| CASP8          | 201844840 | rs3817578     | 99.6      | 99.4      | G / A                    | 0.0479 |
| CASP8          | 201848183 | rs7571586     | 99.9      | 100.0     | G / C                    | 0.0081 |
| CASP8          | 201850083 | rs36043647    | 99.7      | 100.0     | T / C                    | 0.0571 |
| CASP8          | 201857834 | rs1045485     | 99.6      | 99.6      | G / C                    | 0.1347 |
| CASP8/ALS2CR12 | 201860736 | rs1035140     | 99.5      | 98.9      | A / T                    | 0.4541 |
| CASP8/ALS2CR12 | 201860874 | rs35010052    | 96.9      | 81.9      | del / ins                | 0.0141 |
| ALS2CR12       | 201861323 | rs1035142     | 99.6      | 99.8      | G / T                    | 0.3694 |
| ALS2CR12       | 201861470 | rs700635      | 99.7      | 91.4      | A / C                    | 0.2691 |
| ALS2CR12       | 201862034 | rs17383714    | 99.7      | 99.8      | C / T                    | 0.0848 |
| ALS2CR12       | 201862091 | rs11674814    | 98.9      | 98.5      | G / A                    | 0.4450 |
| ALS2CR12       | 201908695 | rs7579792     | 98.1      | 99.7      | G / A                    | 0.0927 |
| ALS2CR12       | 201913442 | rs10185177    | 99.8      | 99.6      | C / T                    | 0.1035 |
| ALS2CR12       | 201924064 | rs3817579     | 99.9      | 79.8      | A / G                    | 0.0148 |

\*\*ins is reference allele

**Supplemental Table S2. Single SNPs results for all 45 tSNPs (dominant, recessive models)**

| Gene            | bp               | SNP               | Model*     | OR <sub>meta</sub> 95% CI | Q p <sub>hom</sub> <sup>^</sup> | p <sub>meta</sub> |
|-----------------|------------------|-------------------|------------|---------------------------|---------------------------------|-------------------|
| CFLAR           | 201704024        | rs12620435        | Rec        | 1.26 0.68-2.33            | 0.94                            | 0.42              |
| CFLAR           | 201706206        | rs11681674        | Dom        | 1.21 0.54-2.71            | 0.075                           | 0.64              |
| CFLAR           | 201718871        | rs7573529         | Rec        | 1.13 0.81-1.59            | 0.40                            | 0.46              |
| CFLAR           | 201726075        | rs719126          | Dom        | 1.16 0.91-1.48            | 0.93                            | 0.25              |
| CFLAR           | 201733376        | rs2518142         | Rec        | 0.91 0.40-2.06            | 0.40                            | 0.82              |
| CFLAR           | 201733866        | rs1594            | Dom        | 1.06 0.90-1.23            | 0.43                            | 0.50              |
| CFLAR           | 201736187        | rs12721503        | Dom        | 0.91 0.65-1.29            | 0.36                            | 0.60              |
| CASP10          | 201763557        | rs12613347        | Rec        | 1.09 0.79-1.49            | 0.28                            | 0.61              |
| CASP10          | 201769065        | rs3731714         | Rec        | 0.85 0.60-1.08            | 0.87                            | 0.18              |
| CASP10          | 201775958        | rs41343445        | Rec        | 0.00 na                   | na                              | 0.24              |
| CASP10          | 201781218        | rs41419046        | Dom        | 1.35 0.80-2.26            | 0.57                            | 0.26              |
| CASP10          | 201782343        | rs13010627        | Dom        | 1.15 0.92-1.43            | 0.40                            | 0.22              |
| CASP10          | 201782452        | rs17860405        | Dom        | 0.82 0.62-1.08            | 0.29                            | 0.15              |
| CASP10          | 201782773        | rs7576306         | Rec        | 1.04 0.89-1.22            | 0.37                            | 0.64              |
| CASP10          | 201784693        | rs6435068         | Rec        | 0.35 na                   | na                              | 0.22              |
| CASP10          | 201786202        | rs41514050        | Dom        | 1.03 na                   | na                              | 0.98              |
| CASP10          | 201788555        | rs10931932        | Rec        | 0.74 0.33-1.68            | 0.23                            | 0.41              |
| CASP10          | 201794910        | rs41373151        | Rec        | 1.45 0.43-4.92            | 0.94                            | 0.39              |
| <b>CASP8</b>    | <b>201805777</b> | <b>rs3834129</b>  | <b>Rec</b> | <b>0.84 0.69-1.02</b>     | <b>0.049</b>                    | <b>0.086</b>      |
| CASP8           | 201819185        | SNP50_9898_ct     | Dom        | 1.37 na                   | na                              | 0.71              |
| CASP8           | 201819204        | rs7608692         | Dom        | 0.99 0.85-1.14            | 0.99                            | 0.85              |
| CASP8           | 201819265        | rs3820972         | Dom        | 1.11 0.92-1.35            | 0.80                            | 0.27              |
| CASP8           | 201819625        | rs3769825         | Rec        | 1.13 0.95-1.34            | 0.95                            | 0.17              |
| CASP8           | 201823079        | rs7570325         | Rec        | na                        | na                              | 0.13              |
| <b>CASP8</b>    | <b>201828012</b> | <b>rs13402616</b> | <b>Rec</b> | <b>2.55 0.76-8.54</b>     | <b>0.12</b>                     | <b>0.047</b>      |
| CASP8           | 201829651        | rs35534358        | Dom        | 1.73 na                   | na                              | 0.51              |
| <b>CASP8</b>    | <b>201831675</b> | <b>rs3769821</b>  | <b>Dom</b> | <b>1.28 1.11-1.48</b>     | <b>0.37</b>                     | <b>0.00053</b>    |
| CASP8           | 201834953        | rs7568770         | Dom        | 5.17 na                   | na                              | 0.12              |
| <b>CASP8</b>    | <b>201836192</b> | <b>rs6435074</b>  | <b>Dom</b> | <b>1.19 1.02-1.40</b>     | <b>0.94</b>                     | <b>0.030</b>      |
| <b>CASP8</b>    | <b>201836863</b> | <b>rs6723097</b>  | <b>Rec</b> | <b>1.29 1.01-1.65</b>     | <b>0.58</b>                     | <b>0.044</b>      |
| CASP8           | 201839832        | rs2293554         | Rec        | 1.38 1.48-4.00            | 0.72                            | 0.56              |
| <b>CASP8</b>    | <b>201840650</b> | <b>rs34088540</b> | <b>Dom</b> | <b>0.79 0.63-1.00</b>     | <b>0.77</b>                     | <b>0.050</b>      |
| CASP8           | 201844840        | rs3817578         | Dom        | 0.86 0.67-1.10            | 0.71                            | 0.22              |
| CASP8           | 201848183        | rs7571586         | Rec        | 0.26 na                   | na                              | 0.26              |
| <b>CASP8</b>    | <b>201850083</b> | <b>rs36043647</b> | <b>Rec</b> | <b>3.11 0.76-12.76</b>    | <b>0.49</b>                     | <b>0.040</b>      |
| <b>CASP8</b>    | <b>201857834</b> | <b>rs1045485</b>  | <b>Rec</b> | <b>0.47 0.27-0.80</b>     | <b>0.72</b>                     | <b>0.0096</b>     |
| CASP8/ALS2CR12  | 201860736        | rs1035140         | Rec        | 1.10 0.93-1.30            | 0.81                            | 0.27              |
| CASP8/ALS2CR12  | 201860874        | rs35010052        | Dom        | 1.23 0.80-1.88            | 0.97                            | 0.35              |
| <b>ALS2CR12</b> | <b>201861323</b> | <b>rs1035142</b>  | <b>Dom</b> | <b>1.17 1.01-1.35</b>     | <b>0.54</b>                     | <b>0.033</b>      |
| <b>ALS2CR12</b> | <b>201861470</b> | <b>rs700635</b>   | <b>Dom</b> | <b>1.25 1.09-1.44</b>     | <b>0.63</b>                     | <b>0.0021</b>     |
| ALS2CR12        | 201862034        | rs17383714        | Rec        | 0.60 0.25-1.43            | 0.99                            | 0.21              |
| ALS2CR12        | 201862091        | rs11674814        | Dom        | 0.94 0.81-1.09            | 0.71                            | 0.41              |
| ALS2CR12        | 201908695        | rs7579792         | Rec        | 0.78 0.36-1.68            | 0.76                            | 0.50              |
| ALS2CR12        | 201913442        | rs10185177        | Dom        | 0.87 0.73-1.04            | 0.57                            | 0.13              |
| ALS2CR12        | 201924064        | rs3817579         | Dom        | 0.92 0.58-1.44            | 0.49                            | 0.70              |

\* dom indicates a dominant model; rec indicates a recessive model; ^ Q test p-value for heterogeneity across sites; bold=nominally significant (p≤0.05); bold & italic = borderline interest (0.1<p<0.05). Data for rs6723097, rs3834129 and rs6435074 (UBCS) were taken from previously published data (reference 12).
